# Supplementary material for: Intensive care discharges: improving the quality of clinical handover through changes to discharge documentation
Source: PubMed Central journal article supplement — BMJ Qual Improv Rep. 2015 Nov 12;4(1):u209711.w4036. doi: 10.1136/bmjquality.u209711.w4036 (PMC4693087; doi:10.1136/bmjquality.u209711.w4036), 2015-11-12
Supplement: bmjqir-4-u209711-w4036-s1.pdf [file bmjqir-4-u209711-w4036-s1.pdf]

# Percentage of Compliant Discharge Summaries (n=28)

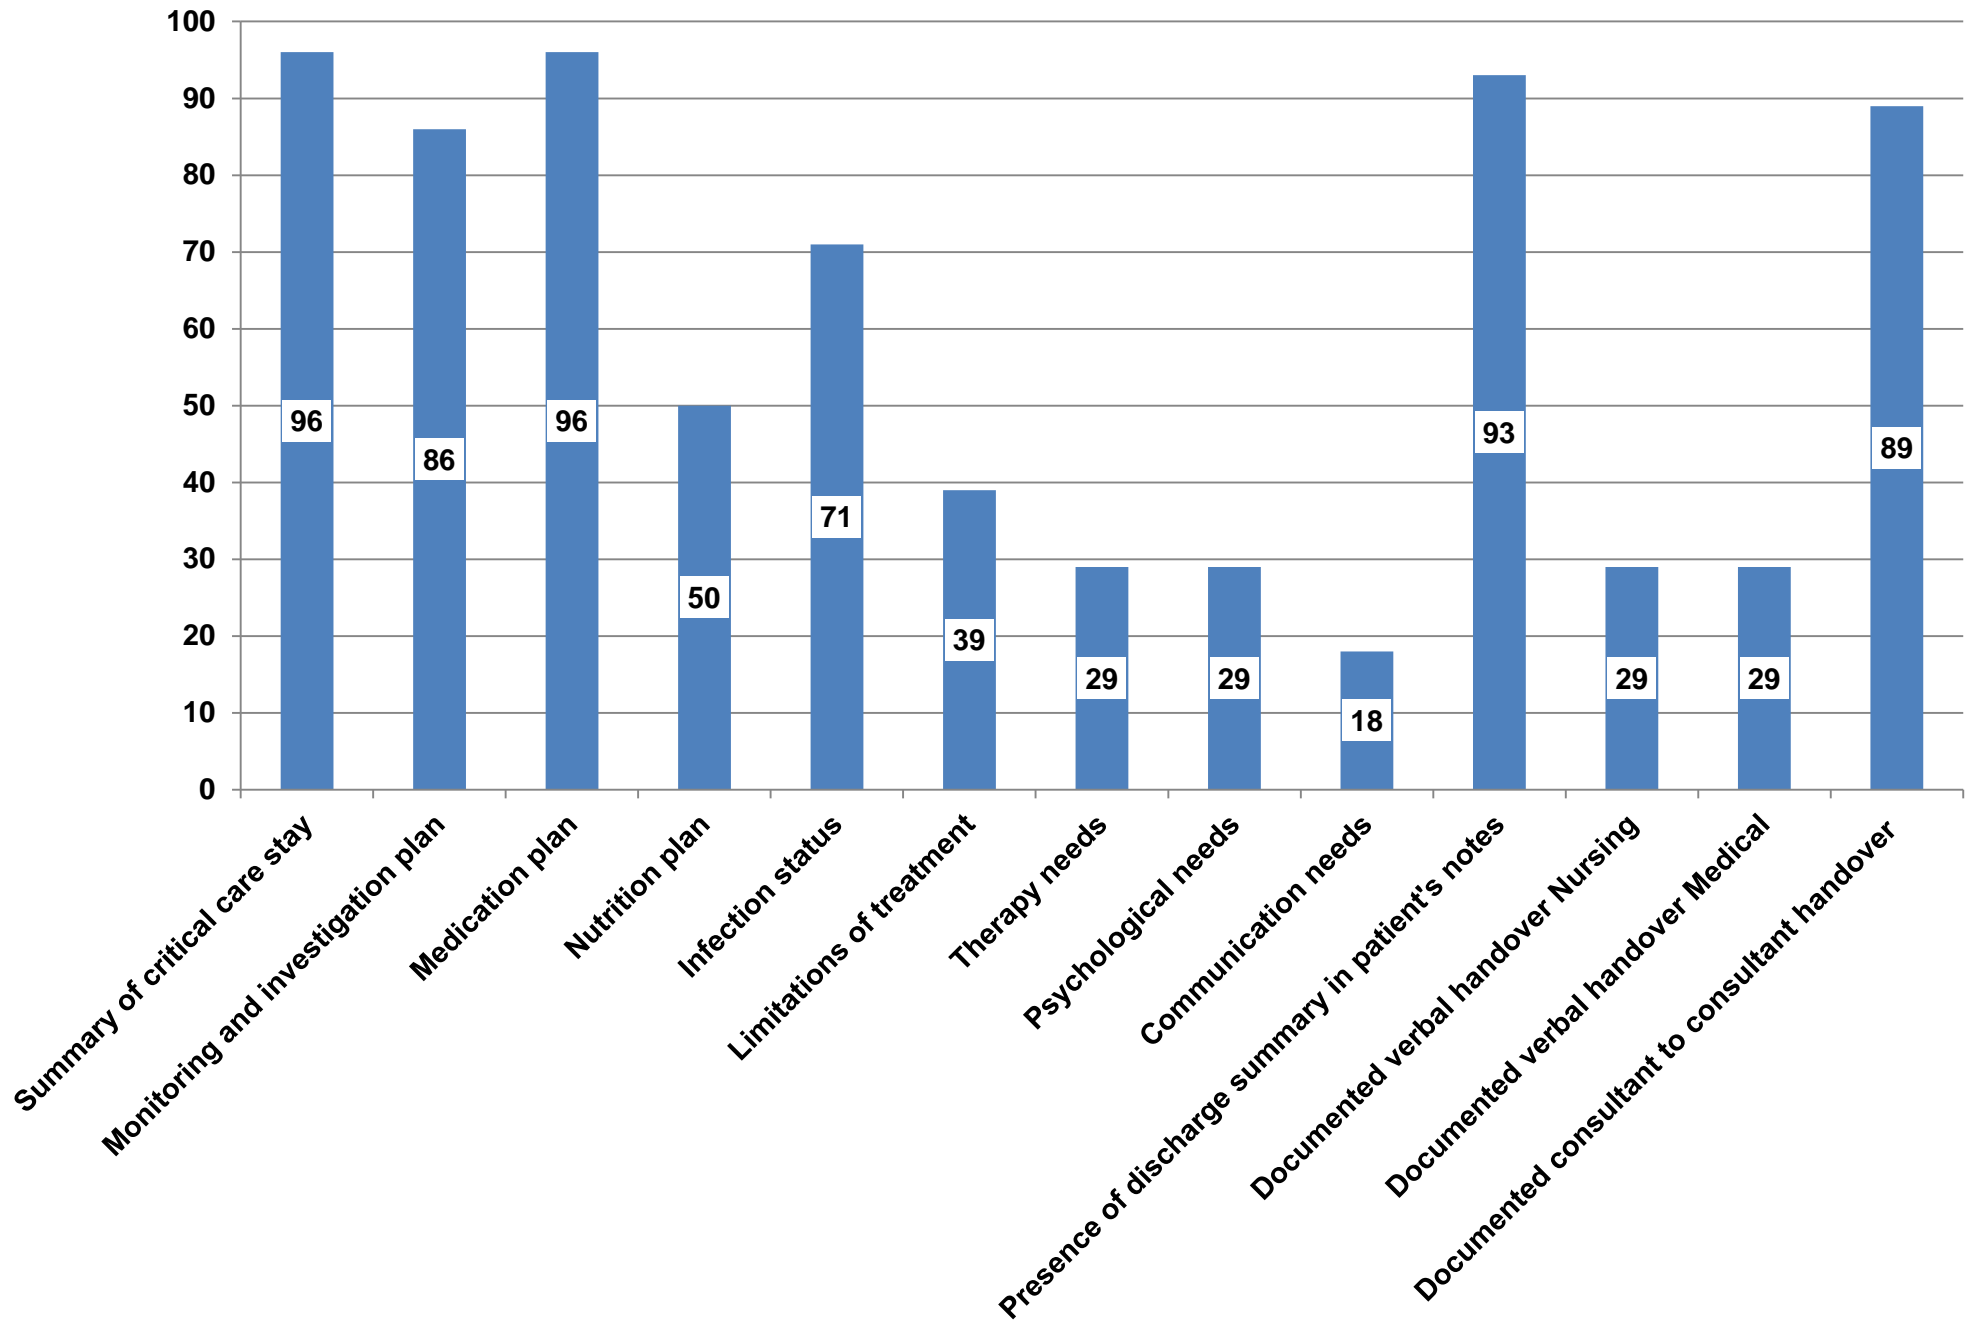

# Percentage of Compliance Before and After Changes to Discharge Summary Template

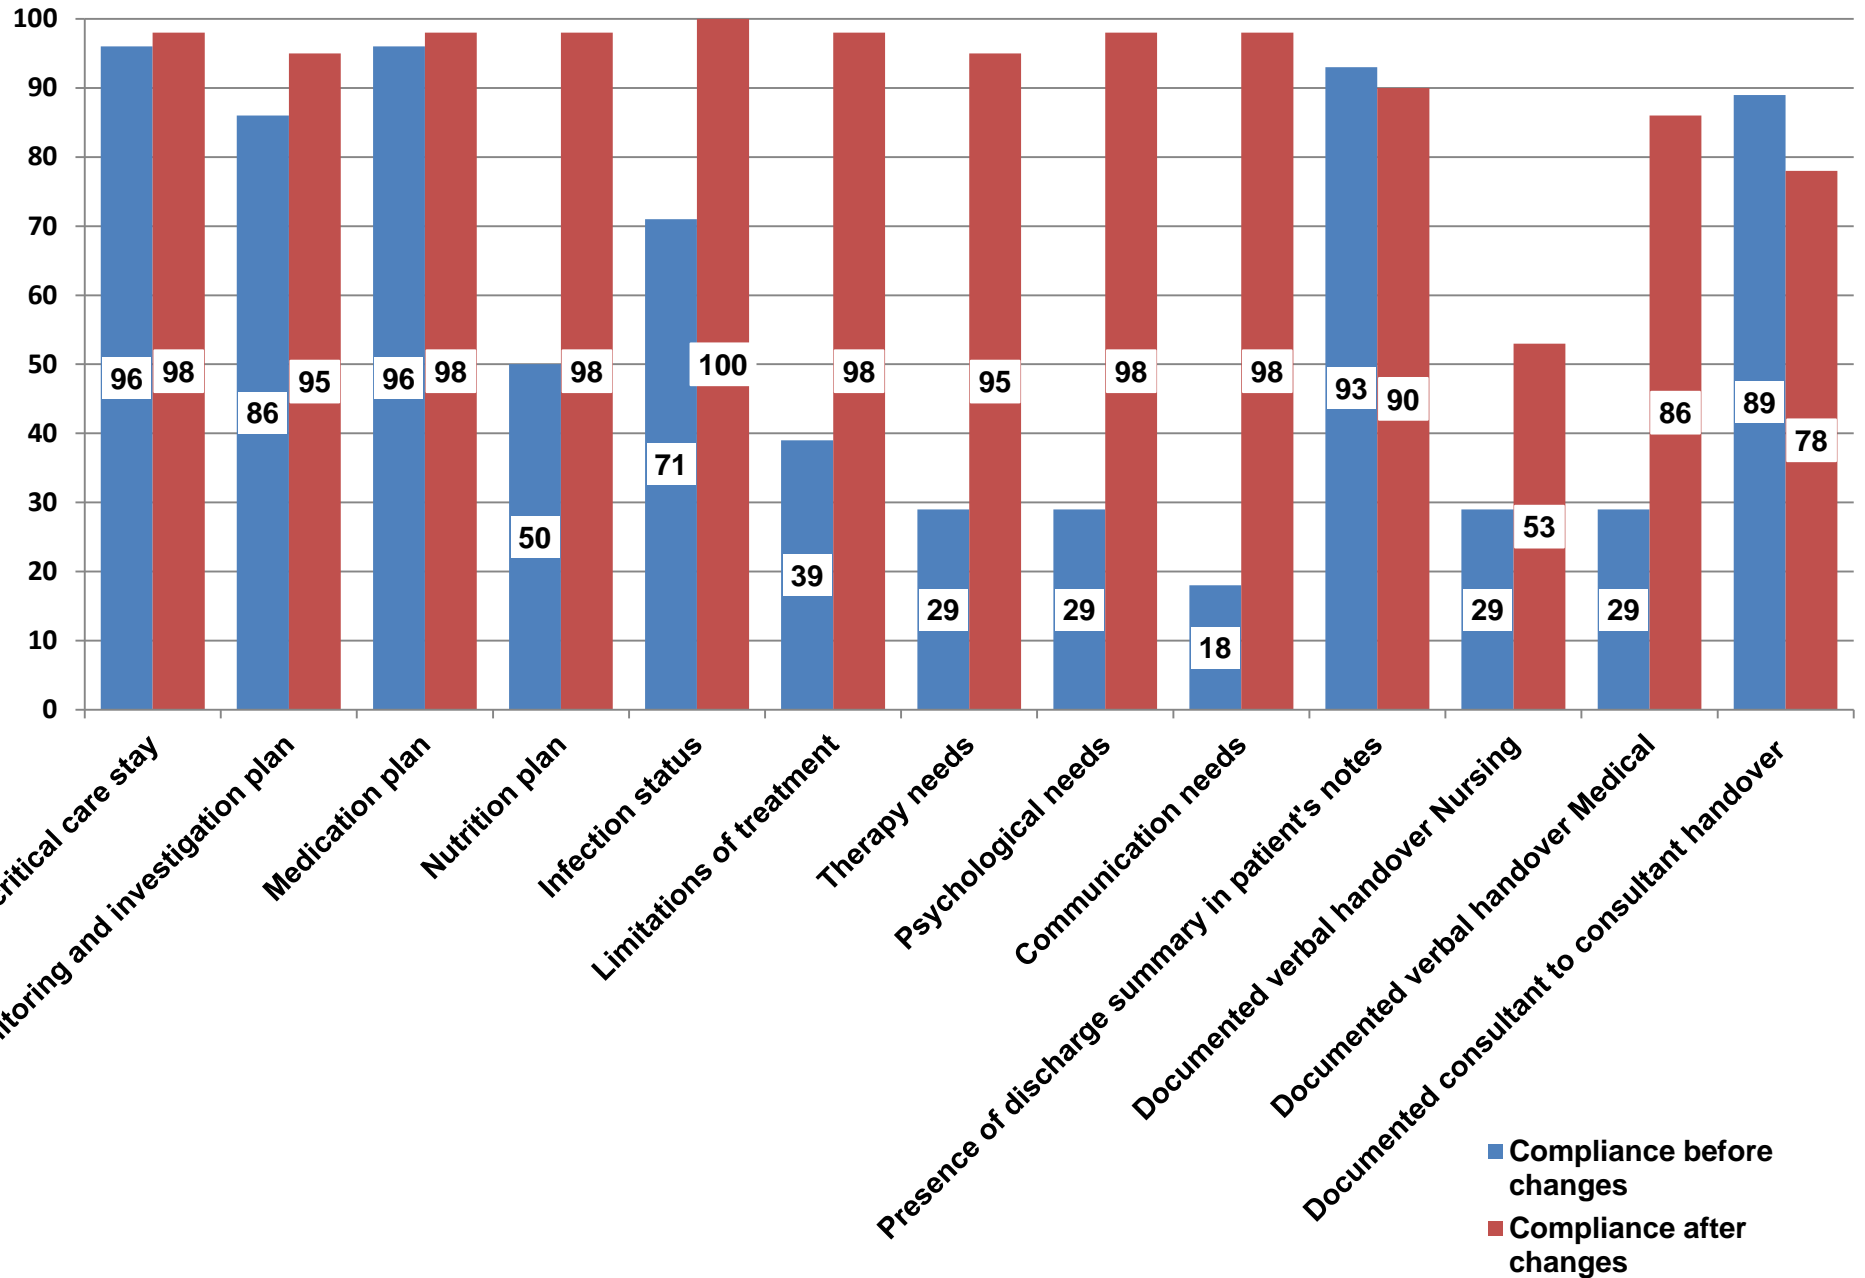

|                            |  |           |  |
|----------------------------|--|-----------|--|
| ITU Discharge Summary      |  | Ward :    |  |
| Discharging ITU Dr & bleep |  | Date/time |  |
| Accepting ward Dr          |  | Date/time |  |
| Follow up ITU Dr           |  | Date/time |  |

**Discharging ITU Consultant:**

**Diagnosis on Admission:**

**Background:**

**Admission:**

**Investigations:**

**ITU admission details:**

**Ongoing issues:**

**Duration of ITU stay (days):**

|  |
|--|
|  |
|--|

|                                      |
|--------------------------------------|
| Ongoing investigations:              |
| Recommended monitoring observations: |
| Call back triggers:                  |

Allergies:  
Current Regular Medications:

| Drug | Dose | Route | Freq | Duration |
|------|------|-------|------|----------|
|      |      |       |      |          |
|      |      |       |      |          |
|      |      |       |      |          |

| Infection Summary |      | Status MRSA?       | N            | Clostridium Difficile?       | N    |                |                        |                    |  |
|-------------------|------|--------------------|--------------|------------------------------|------|----------------|------------------------|--------------------|--|
|                   |      | Ongoing treatment? | N            | Ongoing Isolation essential? | N    |                |                        |                    |  |
| Invasive Device   | Site | Date Placed        | Removal Date | Sample                       | Date | Organism grown | Antibiotics Prescribed | Treatment Duration |  |
|                   |      |                    |              |                              |      |                |                        |                    |  |

|                             |                                                   |
|-----------------------------|---------------------------------------------------|
| Time of ITU ward discharge- | Between 2200-0700-Fill out Critical incident Form |
|                             | Form completed      Yes      No                   |

|                                    | Yes (please give details) | No (if not please state why) | ITU Cons aware | Primary Team aware | Discussed with patient/family |
|------------------------------------|---------------------------|------------------------------|----------------|--------------------|-------------------------------|
| Limitations of Treatment           |                           |                              |                |                    |                               |
| DNAR status stated                 |                           |                              |                |                    |                               |
| Appropriate for Readmission to ITU |                           |                              |                |                    |                               |

|                                                                                                                                          |
|------------------------------------------------------------------------------------------------------------------------------------------|
| <p><b>Medical verbal handover completed &amp; documented in notes? Y/N</b><br/> Ward doctor's name &amp; job:<br/> Bleep:<br/> Team:</p> |
|------------------------------------------------------------------------------------------------------------------------------------------|

|                                                                                                          |
|----------------------------------------------------------------------------------------------------------|
| <p><b>Nursing handover completed and recorded in notes? Y/N</b><br/> Name of ITU nurse on discharge:</p> |
|----------------------------------------------------------------------------------------------------------|

|  |
|--|
|  |
|--|

| Specific health needs               | Plan for ITU d/c in (delete as appropriate)                                                                                                                                                                                                    |
|-------------------------------------|------------------------------------------------------------------------------------------------------------------------------------------------------------------------------------------------------------------------------------------------|
| <b>Emotional and psychological</b>  | AMTS on discharge 1-10 [ ],<br>Known diagnosis dementia/cognitive impairment [Y/N],<br>Suspected/known delirium on discharge from ITU? [Y/N]<br>Known psychiatric diagnosis? [Y/N]<br>Requires psych follow-up on ward? [Y/N],                 |
| <b>Language/communication needs</b> | Requires translator [Y/N],<br>Able to communicate verbally [Y/N]<br>Safe swallow [Y/N]<br>Requires SALT follow-up on wards? [Y/N]                                                                                                              |
| <b>Physio/rehab</b>                 | Functional status <u>before admission</u> : walking [ ],<br>stick/frame [ ], wheelchair [ ], bedbound [ ]<br>Lives in: own home [ ], sheltered accommodation [ ],<br>residential/nursing home [ ]<br>Requires physio follow-up on wards? [Y/N] |
| <b>Nutritional</b>                  | Is fed via: oral route [ ], NG [ ], PEG [ ], parenteral [ ],<br>other [ ],<br>Has specific conditions/diseases that affect nutrition eg. IBD? [Y/N]<br>Requires dietician follow-up on wards? [Y/N]                                            |

| Date | Na | K | Ur | Cr | Hb | WCC | Plt | CRP |
|------|----|---|----|----|----|-----|-----|-----|
|      |    |   |    |    |    |     |     |     |

|                                    |
|------------------------------------|
| Tracheostomy care bundle required: |
|------------------------------------|
